# Supplementary material
Source: publisher site journal article supplement (https://www.degruyterbrill.com/publication/isbn/9783110336665/downloadAsset/9783110336665_Inhaltsverzeichnis.pdf)
Supplement: Supplementary file 1 [file 9783110336665_Inhaltsverzeichnis.pdf]

# Inhalt

Martin Neef & Carmen Scherer

**Einleitung — 1**

Martin Neef

**Das Konzept des morphologischen Prinzips und seine Rolle  
in einer modularen Schriftsystemtheorie — 9**

Nikolaus Ruge

**Die Graphematik-Morphologie-Schnittstelle in der Geschichte  
des Deutschen — 39**

Rüdiger Weingarten

**Grammatographische Entwicklungen im Deutschen und  
Niederländischen — 69**

Susanne R. Borgwaldt

**Fugenelemente und Bindestriche in neugebildeten NN-Komposita:  
Distribution und Funktion — 103**

Jochen Geilfuß-Wolfgang

**Gute und schlechte Bindestriche in dreiteiligen Komposita — 135**

Carmen Scherer

**Schreibung als Fenster zur Wortstruktur?  
Strukturmarkierende Schreibungen bei Kontaminationen — 157**

Christa Dürscheid & Elisabeth Stark

**Anything goes? SMS, phonographisches Schreiben und  
Morphemkonstanz — 189**

Ursula Bredel, Christina Noack & Ingo Plag

**Morphologie lesen: Stammkonstanzschreibung und Leseverstehen  
bei starken und schwachen Lesern — 211**

**Register — 251**
